# Supplementary material for: Genotypic and Dietary Effects on Egg Quality of Local Chicken Breeds and Their Crosses Fed with Faba Beans
Source: MDPI journal article supplement (doi:10.3390/ani11071947), 2021-06-29
Supplement: s1 [file s1]

## Supplementary material

**Table S1.** Composition, analyzed and calculated nutrient composition of the experimental diets.

| Item                                  | Experiment A |        |        | Experiment B |        |        |
|---------------------------------------|--------------|--------|--------|--------------|--------|--------|
|                                       | Soy          | VC+    | VC-    | Soy          | VC+    | VC-    |
| Ingredients (%)                       |              |        |        |              |        |        |
| Wheat                                 | 40.39        | 29.78  | 29.78  | 40.39        | 29.78  | 29.78  |
| Corn                                  | 10.00        | 10.89  | 10.89  | 10.00        | 10.89  | 10.89  |
| Soybean meal (39.8% CP)               | 11.84        | -      | -      | 11.84        | -      | -      |
| Blue sweet lupine cv. Boruta          | 21.00        | 21.13  | 21.13  | 21.00        | 21.13  | 21.13  |
| Faba bean cv. Fuego                   | -            | 20.00  | -      | -            | 20.00  | -      |
| Faba bean cv. Tiffany                 | -            | -      | 20.00  | -            | -      | 20.00  |
| Soybean oil                           | 4.00         | 5.77   | 5.77   | 4.00         | 5.77   | 5.77   |
| Dicalcium phosphate                   | 2.76         | 2.51   | 2.51   | 2.76         | 2.51   | 2.51   |
| Calcium carbonate                     | 8.39         | 8.25   | 8.25   | 8.39         | 8.25   | 8.25   |
| Sodium chloride                       | 0.32         | 0.25   | 0.25   | 0.32         | 0.25   | 0.25   |
| DL-Methionine                         | 0.21         | 0.28   | 0.28   | 0.21         | 0.28   | 0.28   |
| Lysine                                | 0.09         | 0.10   | 0.10   | 0.09         | 0.10   | 0.10   |
| Tryptophan                            | -            | 0.04   | 0.04   | -            | 0.04   | 0.04   |
| Premix <sup>1</sup>                   | 1.00         | 1.00   | 1.00   | 1.00         | 1.00   | 1.00   |
| Chemical composition                  |              |        |        |              |        |        |
| Dry matter abs (%) <sup>2</sup>       | 89.60        | 89.50  | 89.50  | 90.90        | 91.20  | 90.90  |
| Crude ash (g/kg DM) <sup>2</sup>      | 152.60       | 149.30 | 148.70 | 129.70       | 139.50 | 146.70 |
| Crude protein (g/kg DM) <sup>2</sup>  | 182.40       | 171.90 | 185.30 | 185.20       | 202.10 | 184.10 |
| Crude fat (g/kg DM) <sup>2</sup>      | 95.00        | 88.80  | 97.40  | 91.10        | 83.70  | 91.80  |
| Crude fiber (g/kg DM) <sup>2</sup>    | 54.60        | 50.30  | 54.50  | 61.80        | 51.30  | 59.20  |
| Starch (g/kg DM) <sup>2</sup>         | 362.60       | 393.10 | 349.50 | 365.90       | 349.5  | 347.00 |
| Sucrose (g/kg DM) <sup>2</sup>        | 29.70        | 25.00  | 24.00  | 24.60        | 26.60  | 24.60  |
| SFA (g/100g fat) <sup>2</sup>         | 17.70        | 17.00  | 16.10  | 17.6         | 16.80  | 16.40  |
| MUFA (g/100g fat) <sup>2</sup>        | 22.50        | 22.60  | 22.80  | 22.70        | 22.80  | 21.80  |
| PUFA (g/100g fat) <sup>2</sup>        | 59.80        | 60.40  | 61.10  | 59.6         | 60.40  | 61.70  |
| Vicine (%) <sup>2</sup>               | 0.016        | 0.079  | 0.003  | 0.0          | 0.095  | 0.015  |
| Convicine (%) <sup>2</sup>            | 0.006        | 0.037  | 0.002  | 0.0          | 0.039  | 0.004  |
| VC (Vicin + Convicin; %) <sup>3</sup> | 0.022        | 0.116  | 0.005  | 0.0          | 0.134  | 0.019  |
| Tannin (mg/g) <sup>2</sup>            | 3.51         | 3.02   | 3.33   | 3.22         | 3.91   | 3.67   |
| AMEn (MJ/kg) <sup>3,4</sup>           | 12.53        | 12.60  | 12.36  | 12.43        | 12.19  | 12.12  |
| Methionine (%) <sup>3</sup>           | 0.42         | 0.44   | 0.44   | 0.42         | 0.44   | 0.44   |
| Lysine (%) <sup>3</sup>               | 0.81         | 0.83   | 0.83   | 0.81         | 0.83   | 0.83   |
| Tryptophan (%) <sup>3</sup>           | 0.16         | 0.17   | 0.17   | 0.16         | 0.17   | 0.17   |
| Threonine (%) <sup>3</sup>            | 0.58         | 0.55   | 0.55   | 0.58         | 0.55   | 0.55   |

CP: crude protein, SFA: saturated fatty acids, MUFA: monounsaturated fatty acids, PUFA: polyunsaturated fatty acids, AMEn: nitrogen-corrected apparent metabolizable energy; <sup>1</sup> Premix – hens: feed additives (per kg premix): Vitamin A, 1,000,000 IU; Vitamin D3, 250,000 IU; Vitamin E, 2,000 mg; Vitamin B1, 250 mg; Vitamin B2, 700 mg; Vitamin B6, 400 mg; Vitamin B12, 2,000 µg; Vitamin K3, 400 mg; Nicotin amide, 4,000 mg; Calcium-D-pantothenate, 1,000 mg; Folic acid, 60 mg; Biotin, 2,500 µg; Choline chloride, 40,000 mg; Fe, 4,000 mg; Cu, 1,000 mg; Mn, 10,000 mg; Zn, 8,000 mg; I, 120 mg; Se, 25 mg; Co, 20.5 mg; Butylated hydroxy toluene (BHT), 12,500 mg; Beta-carotene, 400 mg; Canthaxanthin, 400 mg; <sup>2</sup> Analyzed; <sup>3</sup> Calculated; <sup>4</sup> Apparent metabolizable energy concentrations corrected to zero nitrogen balance (AMEn), calculated according to the energy estimation equation of the World's Poultry Association (Vogt, 1986)

Cited from: Nolte, T.; Jansen, S.; Halle, I.; Scholz, A. M.; Simianer, H.; Sharifi, A. R.; Weigend, S. Egg Production and Bone Stability of Local Chicken Breeds and Their Crosses Fed with Faba Beans. *Animals* **2020**, *10*. doi: 10.3390/ani10091480.
